# Supplementary material
Source: Springer Nature journal article supplement (https://www.springermedizin.de/resource/supplementary/12992_2011_182_MOESM1_ESM.pdf/9616616)
Supplement: MOESM1 [file 9616616]

**STEP 1: PRELIMINARY IDENTIFICATION OF LITERATURE**

- 1) **Keyword Search of eleven electronic databases**
- 2) **'Google Scholar' Search specific author/subject**
- 3) **Known Books/Book Chapters and Grey Literature**

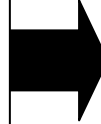

**STEP 2: SELECTION ACCORDING TO INCLUSION AND EXCLUSION CRITERIA, ENTRY IN ZOTERO GROUP LIBRARY**

**Inclusion**

- **Constitutes Major Social Science Contribution**
- **Published in English**

**Exclusion**

- **Epidemiology and medical science papers**

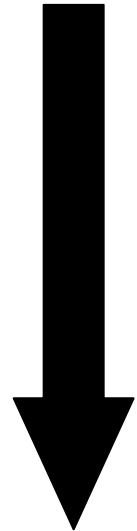

**STEP 5: SUPPLEMENTARY WEB & HAND SEARCHES ON THEMATIC AREAS**

- **Additional Web Searches; Hand Search of 14 key journals published in India for material not captured thus far**
- **Correspondence with key social science institutions/departments and/or individual researchers (n=41)**
- **Search of Institute websites**

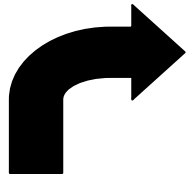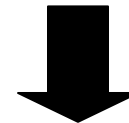

**STEP 4: THEMATIC CLASSIFICATION**

- a. **Transnational Delivery of Services**
- b. **Transnational Consumption of Services**
- c. **Transnational Movement of Capital**
- d. **Transnational Movement of Healthcare Workforce**
- e. **Transnational Trade in Healthcare Related Commodities**
- f. **New Global Governance Issues and Structures**
- g. **Transnational Diffusion of Ideas and Knowledge**

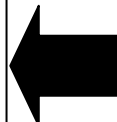

**STEP 3: CODING (tagging)**

- a. **Topic Area**
- b. **Disciplinary Perspective**
- c. **Genre of Publication**
- d. **Methodological Approach**
